# Supplementary material for: Predicting Chinese stock market using XGBoost multi-objective optimization with optimal weighting
Source: PeerJ journal article supplement (doi:10.7717/peerj-cs.1931), 2024-03-08
Supplement: code_data.zip [file code_data.zip]

## Sheet: Sheet1
	OW-XGBoost	OW-RF	OW-SVM	OW-DT	OW-OLS	OW-LR	CSI 300 Index		Monthy return	OW-XGBoost	OW-LR	OW-OLS	OW-SVM	OW-DT	OW-RF	CSI 300 Index
2022-10-10 16:00:00	1.01	0	-0.02	0.03	0.14	0.82	-2.21		2022-10	0.158	-0.0284	-0.0501	-0.0204	-0.01887	-0.0208	-0.0778
2022-10-11 16:00:00	4.34	-0.05	-0.07	-0.1	0.33	1.1	-2.03		2022-11	0.0414	0.0428	0.0347	0.0372	0.0371	0.0371	0.0981
2022-10-12 16:00:00	11.86	0.23	0.18	-0.05	1.16	1.12	-0.54		2022-12	-0.0069	-0.0092	-0.0066	-0.0082	-0.0084	-0.0082	0.0048
2022-10-13 16:00:00	13.38	-0.21	-0.25	-0.34	0.55	0.62	-1.37		2023-1	-0.0134	0.0267	0.0292	0.0266	0.0266	0.0187	0.0737
2022-10-14 16:00:00	16.65	-0.24	-0.26	-0.3	0.17	0.53	0.99		2023-2	-0.0024	0.0002	0.0179	0.0178	0.0205	0.0186	-0.021
2022-10-17 16:00:00	14.33	-0.22	-0.25	-0.38	0.21	0.35	1.09		2023-3	0.0396	0.0422	0.0426	0.0477	0.0468	0.0478	-0.0046
2022-10-18 16:00:00	18.88	-0.19	-0.21	-0.34	0.28	0.15	0.88		2023-4	0.0615	0.0538	0.0637	0.0638	0.0449	0.0635	-0.0054
2022-10-19 16:00:00	16.9	-0.3	-0.32	-0.46	-0.55	0.11	-0.75		Monthly Volatility	OW-XGBoost	OW-LR	OW-OLS	OW-SVM	OW-DT	OW-RF	CSI 300 Index
2022-10-20 16:00:00	13.46	-0.26	-0.29	-0.4	-0.67	-0.38	-1.31		2022-10	0.4746	0.0654	0.0953	0.0548	0.0532	0.0559	0.2217
2022-10-21 16:00:00	16.65	-0.01	-0.03	-0.02	-0.51	-0.86	-1.63		2022-11	0.0686	0.0908	0.0715	0.0698	0.0683	0.0698	0.2385
2022-10-24 16:00:00	11.86	-0.25	-0.26	-0.31	-1.1	-1.72	-4.51		2022-12	0.1027	0.1067	0.1031	0.1057	0.1058	0.1054	0.1314
2022-10-25 16:00:00	14.79	-0.42	-0.43	-0.44	-1.34	-1.68	-4.66		2023-1	0.0641	0.0723	0.1014	0.722	0.0721	0.0683	0.1165
2022-10-26 16:00:00	17.22	-0.9	-0.88	-0.77	-2.97	-1.92	-3.89		2023-2	0.0324	0.0451	0.0975	0.0956	0.1041	0.0995	0.1543
2022-10-27 16:00:00	17.48	-1.15	-1.15	-1.17	-3.31	-1.96	-4.57		2023-3	0.1061	0.1235	0.1209	0.1304	0.1291	0.131	0.1234
2022-10-28 16:00:00	14.37	-0.92	-0.91	-0.81	-3.8	-2.79	-6.93		2023-4	0.1177	0.0883	0.1073	0.1095	0.0848	0.1091	0.1326
2022-10-31 16:00:00	15.8	-2.08	-2.04	-1.87	-5.01	-2.84	-7.78
2022-11-01 16:00:00	16.61	-1.9	-1.86	-1.55	-5.1	-2.41	-4.49
2022-11-02 16:00:00	16.19	-2.25	-2.21	-1.93	-5.44	-2.83	-3.34
2022-11-03 16:00:00	16.13	-2.34	-2.3	-2	-5.54	-3.1	-4.13
2022-11-04 16:00:00	16.95	-1.64	-1.6	-1.27	-4.84	-2.29	-0.99
2022-11-07 16:00:00	16.74	-1.85	-1.81	-1.52	-5.08	-2.75	-0.78
2022-11-08 16:00:00	16.67	-1.9	-1.86	-1.54	-5.12	-2.71	-1.46
2022-11-09 16:00:00	16.75	-1.84	-1.81	-1.51	-5.07	-2.74	-2.38
2022-11-10 16:00:00	16.97	-1.66	-1.62	-1.34	-4.89	-2.6	-3.13
2022-11-11 16:00:00	17.41	-1.28	-1.24	-0.99	-4.52	-2.19	-0.43
2022-11-14 16:00:00	17.23	-1.47	-1.43	-1.18	-4.72	-2.59	-0.29
2022-11-15 16:00:00	17.24	-1.45	-1.41	-1.15	-4.7	-2.53	1.61
2022-11-16 16:00:00	17.01	-1.64	-1.61	-1.33	-4.88	-2.69	0.78
2022-11-17 16:00:00	16.97	-1.69	-1.65	-1.39	-4.93	-2.81	0.36
2022-11-18 16:00:00	16.93	-1.69	-1.65	-1.41	-4.93	-2.69	-0.09
2022-11-21 16:00:00	17.1	-1.56	-1.52	-1.23	-4.79	-2.5	-0.94
2022-11-22 16:00:00	18.28	-0.49	-0.45	-0.19	-3.73	-1.04	-0.93
2022-11-23 16:00:00	18.67	-0.18	-0.15	0.11	-3.44	-0.9	-0.82
2022-11-24 16:00:00	18.38	-0.43	-0.39	-0.11	-3.67	-1.14	-1.26
2022-11-25 16:00:00	19.87	0.9	0.94	1.17	-2.36	0.53	-0.77
2022-11-28 16:00:00	19.49	0.6	0.63	0.87	-2.64	0.28	-1.88
2022-11-29 16:00:00	20.01	1.01	1.05	1.27	-2.27	0.53	1.14
2022-11-30 16:00:00	20.6	1.56	1.6	1.77	-1.72	1.32	1.27
2022-12-01 16:00:00	19.6	0.72	0.76	0.9	-2.53	0.38	2.36
2022-12-02 16:00:00	19.32	0.46	0.49	0.64	-2.77	0.12	1.74
2022-12-05 16:00:00	21.55	2.41	2.45	2.6	-0.89	2.07	3.73
2022-12-06 16:00:00	21.23	2.12	2.16	2.31	-1.15	1.78	4.29
2022-12-07 16:00:00	20.35	1.33	1.37	1.51	-1.88	0.99	4.04
2022-12-08 16:00:00	20.59	1.5	1.54	1.69	-1.73	1.16	4.06
2022-12-09 16:00:00	20.72	1.62	1.66	1.81	-1.62	1.28	5.08
2022-12-12 16:00:00	20.1	1.09	1.13	1.28	-2.01	0.75	3.9
2022-12-13 16:00:00	20.68	1.59	1.63	1.77	-1.58	1.24	3.7
2022-12-14 16:00:00	20.43	1.36	1.4	1.54	-1.81	1.01	3.94
2022-12-15 16:00:00	19.87	0.88	0.92	1.06	-2.22	0.54	3.87
2022-12-16 16:00:00	20.57	1.45	1.49	1.64	-1.66	1.11	3.92
2022-12-19 16:00:00	19.29	0.34	0.38	0.53	-2.72	0	2.32
2022-12-20 16:00:00	18.73	-0.12	-0.09	0.06	-3.16	-0.47	0.63
2022-12-21 16:00:00	18.54	-0.29	-0.25	-0.11	-3.32	-0.63	0.67
2022-12-22 16:00:00	18.96	0.07	0.1	0.25	-2.96	-0.28	0.82
2022-12-23 16:00:00	19.07	0.15	0.19	0.34	-2.88	-0.19	0.61
2022-12-26 16:00:00	18.75	-0.08	-0.05	0.1	-3.09	-0.42	1.01
2022-12-27 16:00:00	19.92	0.91	0.95	1.1	-2.15	0.57	2.18
2022-12-28 16:00:00	20.08	1.03	1.07	1.22	-2.05	0.69	1.74
2022-12-29 16:00:00	19.44	0.46	0.5	0.65	-2.59	0.12	1.36
2022-12-30 16:00:00	19.77	0.73	0.77	0.91	-2.36	0.39	1.75
2023-01-03 16:00:00	18.96	1.12	1.27	1.42	-1.2	0.89	2.18
2023-01-04 16:00:00	19.8	1.98	2.26	2.4	-0.77	1.87	2.31
2023-01-05 16:00:00	19.2	1.86	2.18	2.32	-0.71	1.79	4.3
2023-01-06 16:00:00	18.77	1.61	2.09	2.23	-0.78	1.7	4.63
2023-01-09 16:00:00	18.34	1.69	1.98	2.13	-0.7	1.6	5.47
2023-01-10 16:00:00	17.73	1.33	1.62	1.77	-1.07	1.24	5.59
2023-01-11 16:00:00	17.93	1.54	1.93	2.08	-0.32	1.55	5.39
2023-01-12 16:00:00	17.55	1.85	2.19	2.33	0.09	1.8	5.6
2023-01-13 16:00:00	18.15	2.33	2.89	3.04	0.41	2.5	7.08
2023-01-16 16:00:00	18.14	1.62	2.19	2.34	0.22	1.81	8.75
2023-01-17 16:00:00	17.71	1.46	2.14	2.29	-0.25	1.75	8.73
2023-01-18 16:00:00	17.94	1.88	2.37	2.52	0.16	1.99	8.55
2023-01-19 16:00:00	18.37	1.84	2.46	2.61	0.11	2.07	9.23
2023-01-20 16:00:00	18.66	2.8	3.51	3.66	1.66	3.13	9.9
2023-01-30 16:00:00	18.4	2.71	3.58	3.72	0.51	3.19	10.42
2023-01-31 16:00:00	18.17	2.61	3.45	3.6	0.49	3.06	9.25
2023-02-01 16:00:00	17.83	2.78	3.62	3.8	0.5	2.8	10.28
2023-02-02 16:00:00	17.7	2.81	3.64	3.83	0.5	2.63	9.89
2023-02-03 16:00:00	17.57	2.8	3.64	3.81	0.54	2.65	8.85
2023-02-06 16:00:00	17.42	2.57	3.41	3.57	0.4	2.5	7.41
2023-02-07 16:00:00	17.32	2.31	3.14	3.25	0.12	2.4	7.6
2023-02-08 16:00:00	17.46	2.12	2.97	3.06	-0.04	2.45	7.13
2023-02-09 16:00:00	17.67	2.58	3.42	3.59	0.4	2.52	8.57
2023-02-10 16:00:00	17.92	2.69	3.54	3.77	0.53	2.58	7.92
2023-02-13 16:00:00	17.54	2.5	3.34	3.55	0.32	2.37	8.9
2023-02-14 16:00:00	17.39	2.29	3.12	3.24	0.1	2.43	8.95
2023-02-15 16:00:00	17.34	2.65	3.46	3.66	0.45	2.34	8.38
2023-02-16 16:00:00	17.38	3.58	4.36	4.73	1.37	2.32	7.58
2023-02-17 16:00:00	17.57	3.1	3.91	4.28	0.93	2.11	6.03
2023-02-20 16:00:00	18.12	4.99	5.74	6.22	2.73	3.11	8.64
2023-02-21 16:00:00	18.17	5.23	5.96	6.43	2.94	3.25	8.92
2023-02-22 16:00:00	17.9	4.01	4.8	5.19	1.77	2.83	7.94
2023-02-23 16:00:00	17.9	3.62	4.43	4.78	1.4	2.83	7.85
2023-02-24 16:00:00	17.63	3.51	4.3	4.65	1.3	2.64	6.73
2023-02-27 16:00:00	17.51	3.41	4.21	4.51	1.22	2.73	6.28
2023-02-28 16:00:00	17.88	4.52	5.29	5.72	2.28	3.08	6.95
2023-03-01 16:00:00	18.31	5.21	5.99	6.37	2.61	3.58	8.46
2023-03-02 16:00:00	18.57	5.44	6.22	6.6	2.87	3.74	8.22
2023-03-03 16:00:00	19.73	6.69	7.47	7.85	4.06	4.94	8.56
2023-03-06 16:00:00	19.65	6.9	7.67	8.05	4.2	4.86	7.99
2023-03-07 16:00:00	20.49	7.3	8.09	8.45	4.75	5.55	6.41
2023-03-08 16:00:00	20.64	7.66	8.45	8.81	5	5.87	6.02
2023-03-09 16:00:00	20.89	8.11	8.9	9.27	5.24	6.37	5.65
2023-03-10 16:00:00	19.82	7.04	7.82	8.21	4.25	5.22	4.26
2023-03-13 16:00:00	21.01	9.04	9.82	10.18	5.79	6.51	5.36
2023-03-14 16:00:00	21.24	9.23	10.02	10.38	5.9	6.66	4.73
2023-03-15 16:00:00	22.29	10.25	11.04	11.39	7.01	7.6	4.78
2023-03-16 16:00:00	23.86	11.71	12.5	12.85	8.5	9.06	3.53
2023-03-17 16:00:00	23.98	11.94	12.73	13.08	8.61	9.29	4.05
2023-03-20 16:00:00	24.13	11.12	11.92	12.27	8.14	9.1	3.53
2023-03-21 16:00:00	22.56	9.7	10.49	10.85	6.69	7.63	4.66
2023-03-22 16:00:00	23.37	10.46	11.25	11.59	7.42	8.32	5.11
2023-03-23 16:00:00	23.97	11.12	11.91	12.26	7.9	9.01	6.16
2023-03-24 16:00:00	22.38	9.47	10.26	10.61	6.42	7.27	5.84
2023-03-27 16:00:00	21.71	8.57	9.36	9.7	5.69	6.48	5.46
2023-03-28 16:00:00	22.45	9.28	10.07	10.41	6.4	7.28	5.11
2023-03-29 16:00:00	22.68	9.5	10.3	10.63	6.68	7.42	5.29
2023-03-30 16:00:00	22.57	9.14	9.93	10.26	6.46	7.15	6.14
2023-03-31 16:00:00	22.55	9.52	10.31	10.66	6.65	7.43	6.47
2023-04-03 16:00:00	22.25	9.45	10.24	10.14	6.64	7	7.51
2023-04-04 16:00:00	23.38	11.14	11.95	11.42	8.25	8.21	7.84
2023-04-06 16:00:00	23.46	11.46	12.26	11.54	8.57	8.53	7.67
2023-04-07 16:00:00	23.21	11.18	11.97	11.35	8.3	8.31	8.37
2023-04-10 16:00:00	22.69	11.29	12.07	11.44	8.42	8.35	7.88
2023-04-11 16:00:00	23.34	11.49	12.29	11.71	8.63	8.86	7.76
2023-04-12 16:00:00	24.47	12.64	13.46	12.66	9.7	9.7	7.68
2023-04-13 16:00:00	25.41	12.82	13.64	13.27	9.9	10.13	6.94
2023-04-14 16:00:00	25.27	13.01	13.84	13.1	10.08	9.98	7.55
2023-04-17 16:00:00	28.04	15.12	15.97	14.75	12.12	11.63	9.05
2023-04-18 16:00:00	28.69	16.17	17.02	15.31	13.14	12.38	9.39
2023-04-19 16:00:00	29.36	15.88	16.73	15.26	12.88	12.53	8.4
2023-04-20 16:00:00	29.47	15.87	16.73	15.07	12.87	12.42	8.1
2023-04-21 16:00:00	28.75	14.99	15.84	14.48	12.03	11.7	5.98
2023-04-24 16:00:00	29.31	15.51	16.36	14.97	12.52	12.27	4.67
2023-04-25 16:00:00	31.17	16.61	17.48	15.78	13.61	13.28	4.15
2023-04-26 16:00:00	29.83	15.79	16.65	15.52	12.8	12.9	4.06
2023-04-27 16:00:00	29.87	16.46	17.34	15.82	13.44	13.38	4.82
2023-04-28 16:00:00	30.09	16.47	17.35	15.63	13.44	13.21	5.89
